# Supplementary material for: Mechanism analysis of the capacitance contributions and ultralong cycling-stability of the isomorphous MnO2@MnO2 core/shell nanostructures for supercapacitors
Source: Royal Society of Chemistry journal article supplement (doi:10.1039/c4ta06793b), 2015-01-01
Supplement: c4ta06793b1.pdf [file c4ta06793b1.pdf]

## Electronic Supplementary Information (ESI)

### Mechanism analysis of the capacitance contributions and ultralong cycling-stability of the isomorphous MnO<sub>2</sub>@MnO<sub>2</sub> core/shell nanostructures for supercapacitors

Jiajia Shao,<sup>a</sup> Xiyong Zhou,<sup>a,\*</sup> Qian Liu,<sup>b</sup> Rujia Zou,<sup>b,c</sup> Wenyao Li,<sup>a,b,\*</sup> Jianmao Yang<sup>b</sup> and Junqing Hu<sup>b,\*</sup>

<sup>a</sup>*School of material engineering, Shanghai university of engineering science, Shanghai 201620, China.*

<sup>b</sup>*State Key Laboratory for Modification of Chemical Fibers and Polymer Materials, College of Materials Science and Engineering, Donghua University, Shanghai 201620, China.*

<sup>c</sup>*Center of Super-Diamond and Advanced Films (COSDAF), Department of Physics and Materials Science, City University of Hong Kong, Hong Kong.*

\* E-mail:xiyongzhou@yahoo.com; liwenyao314@gmail.com; hu.junqing@dhu.edu.cn

#### Part I: Calculations

The specific capacitance of the electrode was calculated from the C-V curves according to the following equation,  $C = Q / (\Delta V \cdot m)$ , where C (F g<sup>-1</sup>) is the specific capacitance, m (g) is the mass of the MnO<sub>2</sub> in the electrodes, Q (C) is an average charge during the charging and discharging process, and  $\Delta V$  (V) is the potential window. The discharge specific capacitance is calculated from the discharge curves using the following formula,  $C = I \cdot \Delta t / (\Delta V \cdot m)$ , where I (A),  $\Delta t$  (s), m (g), and  $\Delta V$  (V) are the discharge current, discharge time consumed in the potential range of  $\Delta V$ , mass of the active materials (or mass of the total electrode materials), and the potential windows, respectively.

## Part II: Supplementary Figures

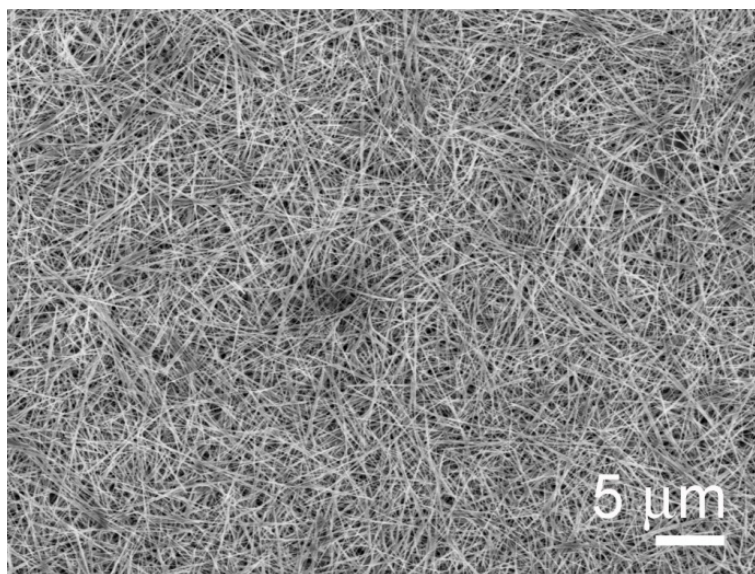

**Fig. S1** Low magnification SEM images of MnO<sub>2</sub> nanowires.

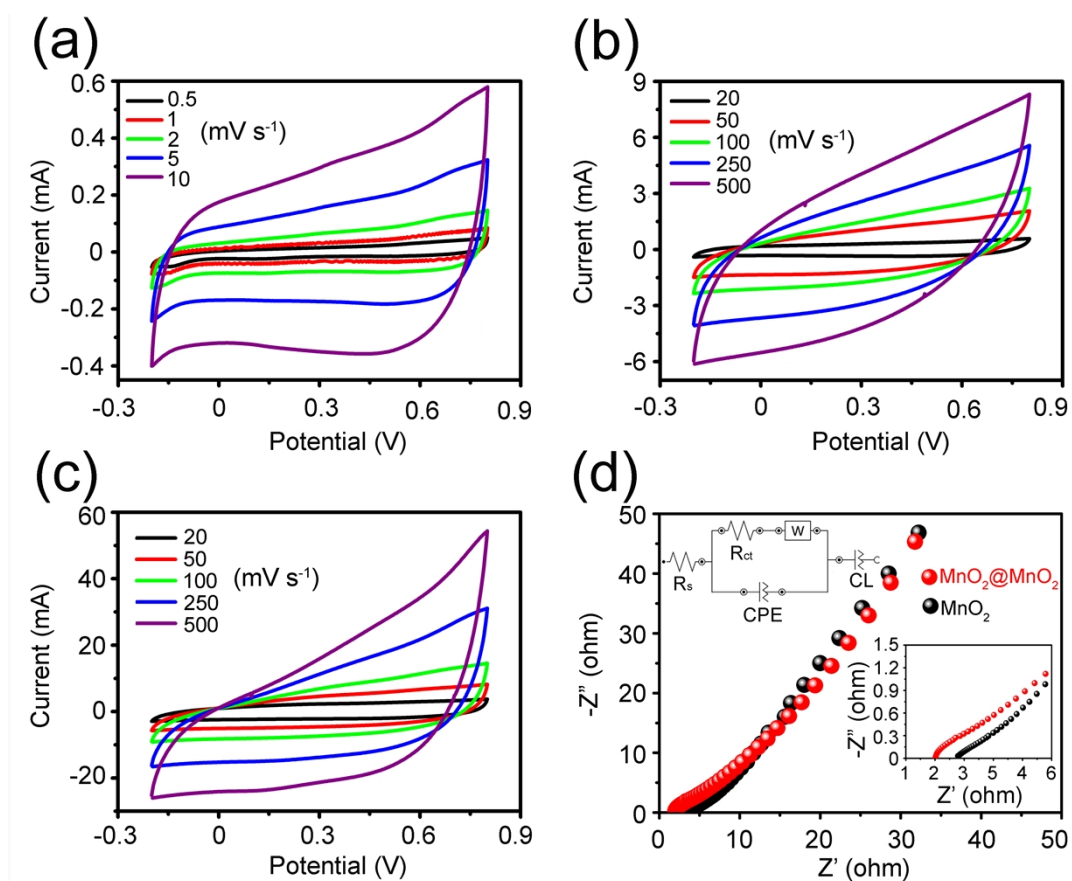

**Fig. S2** CV curves of MnO<sub>2</sub> electrode at low scan rates (a) and high scan rates (b), respectively. (c) CV curves of MnO<sub>2</sub>@MnO<sub>2</sub> electrode at different high scan rates. (d) Nyquist plots of the MnO<sub>2</sub>@MnO<sub>2</sub> and MnO<sub>2</sub> electrodes, inner lower right corner is

corresponding enlarged spectra, and the top left corner is the corresponding equivalent fitting circuit.

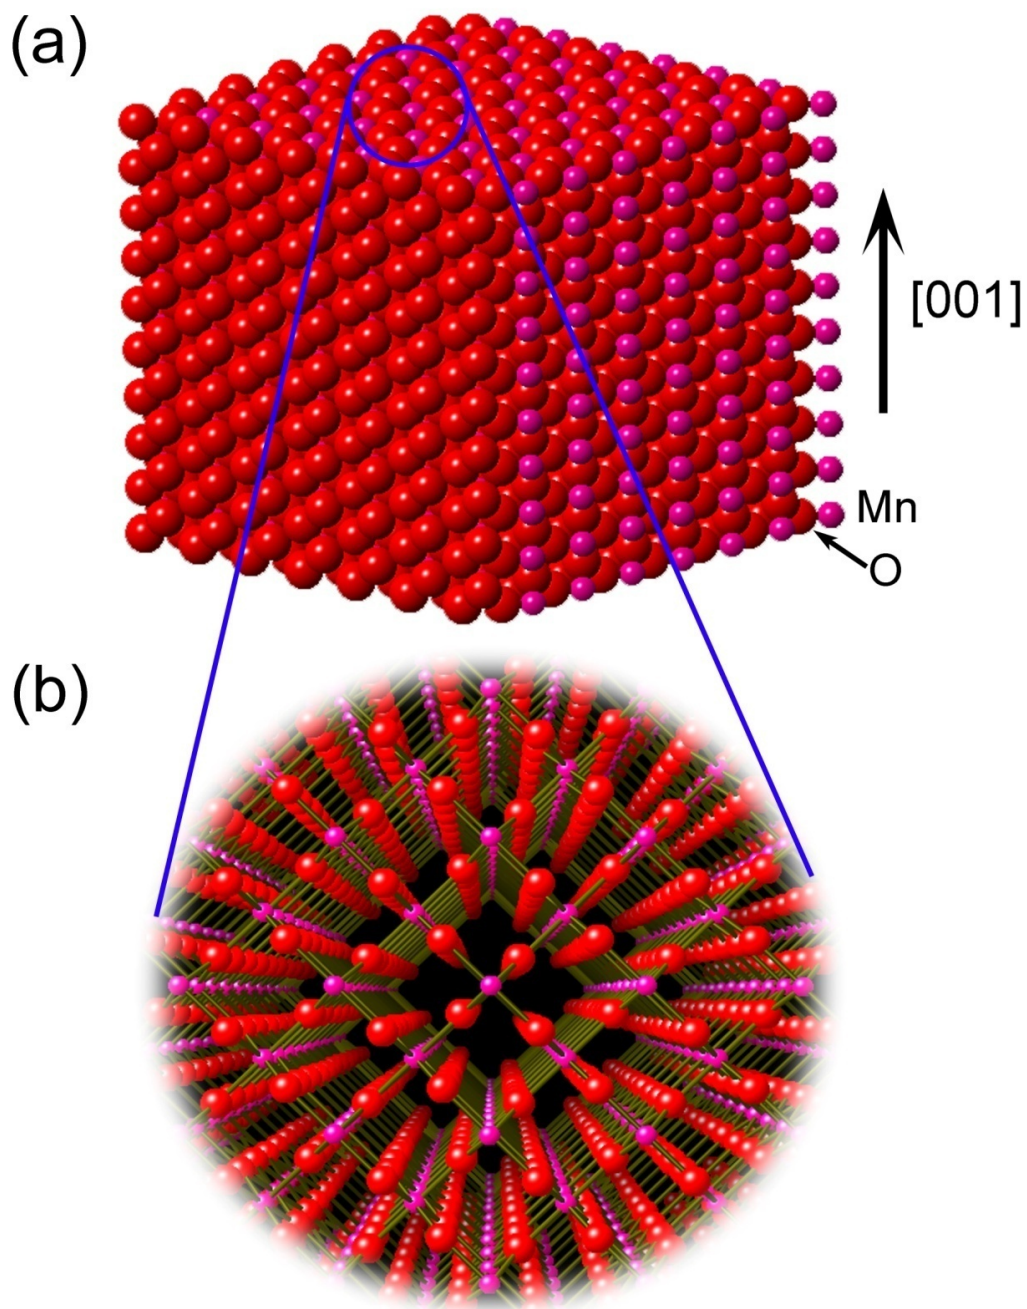

**Fig. S3** Graphical representation of the atom positions comprising, structure of the nanoparticles: (a) model representation showing the stacking of the Mn and O plans along the [100]; (b) segment of the nanoparticles, cut from (a) illustrating more clearly the related migration paths, ball and stick representation. Red spheres are oxygen, purple manganese.

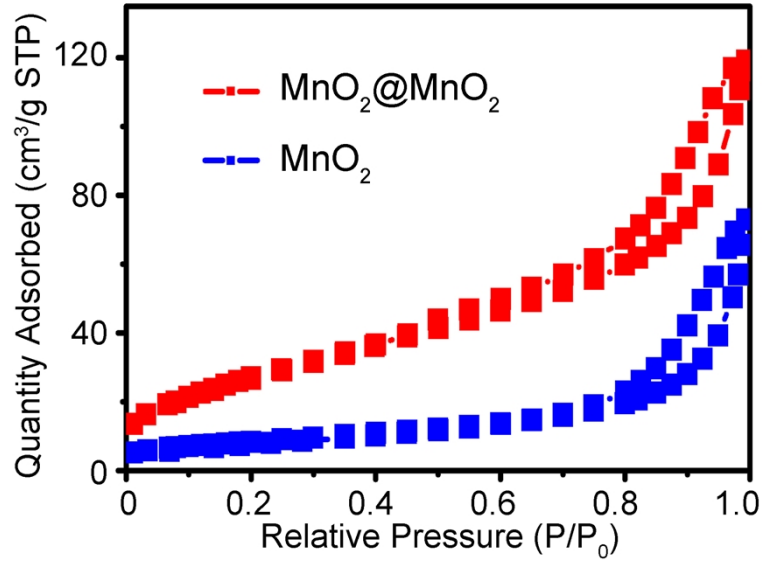

**Fig. S4** Nitrogen adsorption and desorption isotherms of the isomorphous  $\text{MnO}_2@\text{MnO}_2$  core/shell nanostructure and  $\text{MnO}_2$  nanowires.

**Part III: Supplementary Table**

|                  | $\text{MnO}_2@\text{MnO}_2$ |                   |                         | $\text{MnO}_2$    |                   |                         |
|------------------|-----------------------------|-------------------|-------------------------|-------------------|-------------------|-------------------------|
| Scan rate (mV/s) | Capacitance (F/g)           | $\propto V$ (F/g) | $\propto V^{1/2}$ (F/g) | Capacitance (F/g) | $\propto V$ (F/g) | $\propto V^{1/2}$ (F/g) |
| Trassati Method  | 208.3                       | 151.8             | 56.5                    | 43.5              | 31.5              | 12.0                    |
| 0.5              | 190.4                       | 144.7             | 45.7                    | 41.6              | 30.6              | 11.0                    |
| 1                | 180.5                       | 147.5             | 33.0                    | 38.5              | 30.8              | 7.7                     |
| 2                | 172.8                       | 149.3             | 23.5                    | 36.2              | 30.6              | 5.6                     |
| 5                | 165.2                       | 150.2             | 15                      | 34.3              | 30.8              | 3.5                     |
| 10               | 161.9                       | 151.2             | 10.7                    | 32.7              | 30.2              | 2.5                     |

**Table S1** Capacitance of the pristine  $\text{MnO}_2$  and  $\text{MnO}_2@\text{MnO}_2$  in a 0.5 M  $\text{Na}_2\text{SO}_4$  solution at different scan rates  $\propto V$  and  $\propto V^{1/2}$  correspond to the current contributions

from the surface capacitive effects and the diffusion-controlled intercalation process, respectively. The capacitance fluctuation of capacitive processes ( $\propto v$ ) for  $\text{MnO}_2@ \text{MnO}_2$  core/shell nanostructures maybe caused by continuously activation process of the electrodes during the CV test.
